least negative inotropic effect and halothane the most. When combined negative inotropic effects of CHF and anesthetics at 1 MAC are compared, cyclopropane has the least depressant effect, and there is no essential difference among the other four anesthetics (halothane, enflurane, isoflurane and fluroxene).

The authors acknowledge the excellent technical assistance of Charles Gamble, B.E.E., and Carolyn Shanks, B.A., and the assistance of Patricia Roche, M.A., in preparing the manuscript. Fluroxene and enflurane used in this study were supplied by Mr. James Vitcha, Ohio Medical Products, a Division of Airco, Inc.

### References

- Shimosato S, Yasuda I, Kemmotsu O, et al: Effect of halothane on altered contractility of isolated heart muscle obtained from cats with experimentally produced ventricular hypertrophy and failure. *Br J Anaesth* 45:2-9, 1973
- Kemmotsu O, Hashimoto Y, Shimosato S: Inotropic effects of isoflurane on mechanics of contraction in isolated cat papillary muscles from normal and failing hearts. *ANESTHESIOLOGY* 39:470-477, 1973
- Hashimoto Y, Kemmotsu O, Shimosato S: Effect of cyclopropane on contractile performance of cardiac muscle with experimental chronic heart failure. *Br J Anaesth*, in press, 1973
- Spann JF, Buccino RA, Sonnenblick EH, et al: Contractile state of cardiac muscle obtained from cats with experimentally produced ventricular hypertrophy and heart failure. *Circ Res* 21:341-354, 1967
- Munson ES, Saidman LJ, Eger EI II: Effect of nitrous oxide and morphine on the minimum anesthetic concentration of fluroxene. *ANESTHESIOLOGY* 26:134-139, 1965
- Gion H, Saidman LJ: The minimum alveolar concentration of enflurane in man. *ANESTHESIOLOGY* 35:361-364, 1971
- Gold HK, Prindle KH, Levey GS, et al: Effects of experimental heart failure on the capacity of glucagon to augment myocardial contractility and activate adenyl cyclase. *J Clin Invest* 49:999-1006, 1970
- Spann JF, Covell JW, Eckberg DL, et al: Contractile performance of the hypertrophied and chronically failing cat ventricle. *Am J Physiol* 223:1150-1157, 1972
- Spann JF: Heart failure and ventricular hypertrophy—altered cardiac contractility and compensatory mechanisms. *Am J Cardiol* 23:504-510, 1969
- Eger EI II, Smith NT, Cullen DJ, et al: A comparison of the cardiovascular effects of halothane, fluroxene, ether and cyclopropane in man: A resumé. *ANESTHESIOLOGY* 34:25-41, 1971
- Smith NT, Eger EI II, Cullen BF, et al: The cardiovascular responses to the addition of nitrous oxide to fluroxene in man. *Br J Anaesth* 44:142-149, 1972
- Skovsted P, Price HL: Central sympathetic excitation caused by fluroxene. *ANESTHESIOLOGY* 32:210-217, 1970
- Dobkin AB, Heinrich RG, Israel JS, et al: Clinical and laboratory evaluation of a new inhalation agent: Compound 347 ( $\text{CHF}_2\text{-O-CF}_2\text{-CHFCl}$ ). *ANESTHESIOLOGY* 29:275-287, 1968
- Brown BR, Crout JR: A comparative study of the effects of five general anesthetics on myocardial contractility: I. Isometric conditions. *ANESTHESIOLOGY* 34:236-245, 1971

### Circulation

**DOPPLER METHOD FOR TIBIAL ARTERY** Determination of auscultatory blood pressure in the lower extremity is frequently difficult because of the large, difficult-to-fit cuff needed on the thigh or the absence of Korotkoff sounds in the popliteal or posterior tibial areas. Forty-four patients from 6.5 to 25 years old (weights, 17 to 91 kg) were studied, comparing blood pressures obtained by the Doppler method over the brachial and posterior tibial arteries. There was a difference of less than 0.5 inch

between the circumferences of the upper arm and the lower leg just above the ankle, so the same width of cuff was used for both sites. The paired data showed the systolic pressures in the leg to be slightly higher than those in the arm, with a mean difference of only  $\pm 2.66$  mm Hg ( $\text{SD} \pm 5.6$ ). Diastolic pressures were not significantly different. (Hartmann, A. F., Jr., and others: *Measurement of Blood Pressure in the Brachial and Posterior Tibial Arteries Using the Doppler Method. J. Pediatr.* 82: 498-500, 1973.)
